# Supplementary material
Source: PubMed Central journal article supplement (PMC6395922)
Supplement: AAC.01924-18-s0001.pdf [file AAC.01924-18-s0001.pdf]

# FIG S1

(A)

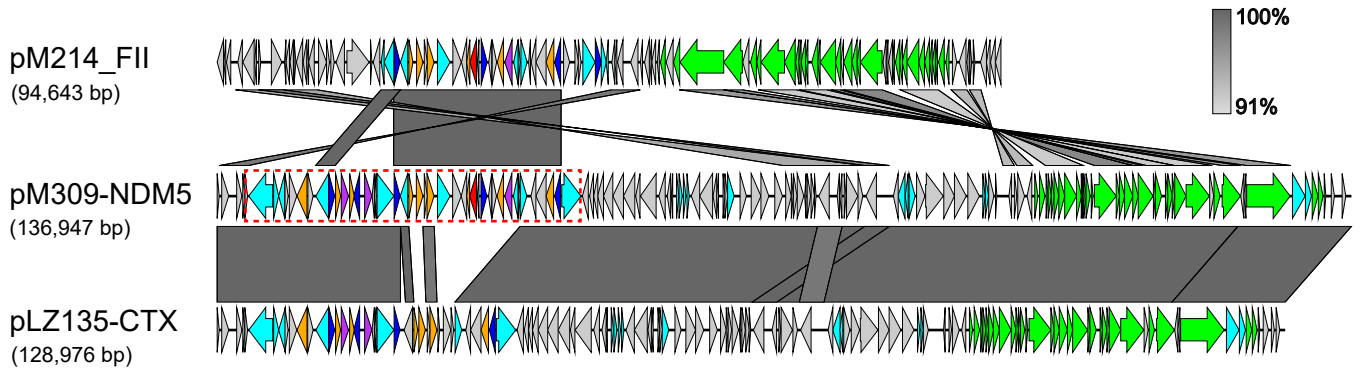

(B)

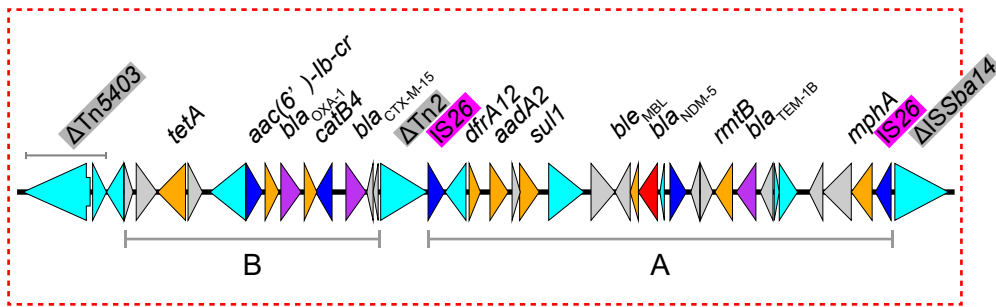

**FIG S1.** Genomic structure of the *bla*<sub>NDM-5</sub>-harboring plasmid pM309-NDM5 identified in *E. coli* isolate M309. (A) Related plasmids (pM214\_FII and pLZ135-CTX) are included for comparison, and homologous regions are shaded in dark gray. The red dotted rectangle indicates the antimicrobial resistance gene cluster. *bla*<sub>NDM-5</sub>, red; other  $\beta$ -lactamase genes, purple; other antimicrobial-resistance genes, orange; IS26 transposase genes, blue; other mobile genetic elements, cyan; conjugal transfer genes, green; other accessory genes, light gray. (B) A magnified image of the multidrug-resistance region shown by red dotted rectangle in (A).

**FIG S2**

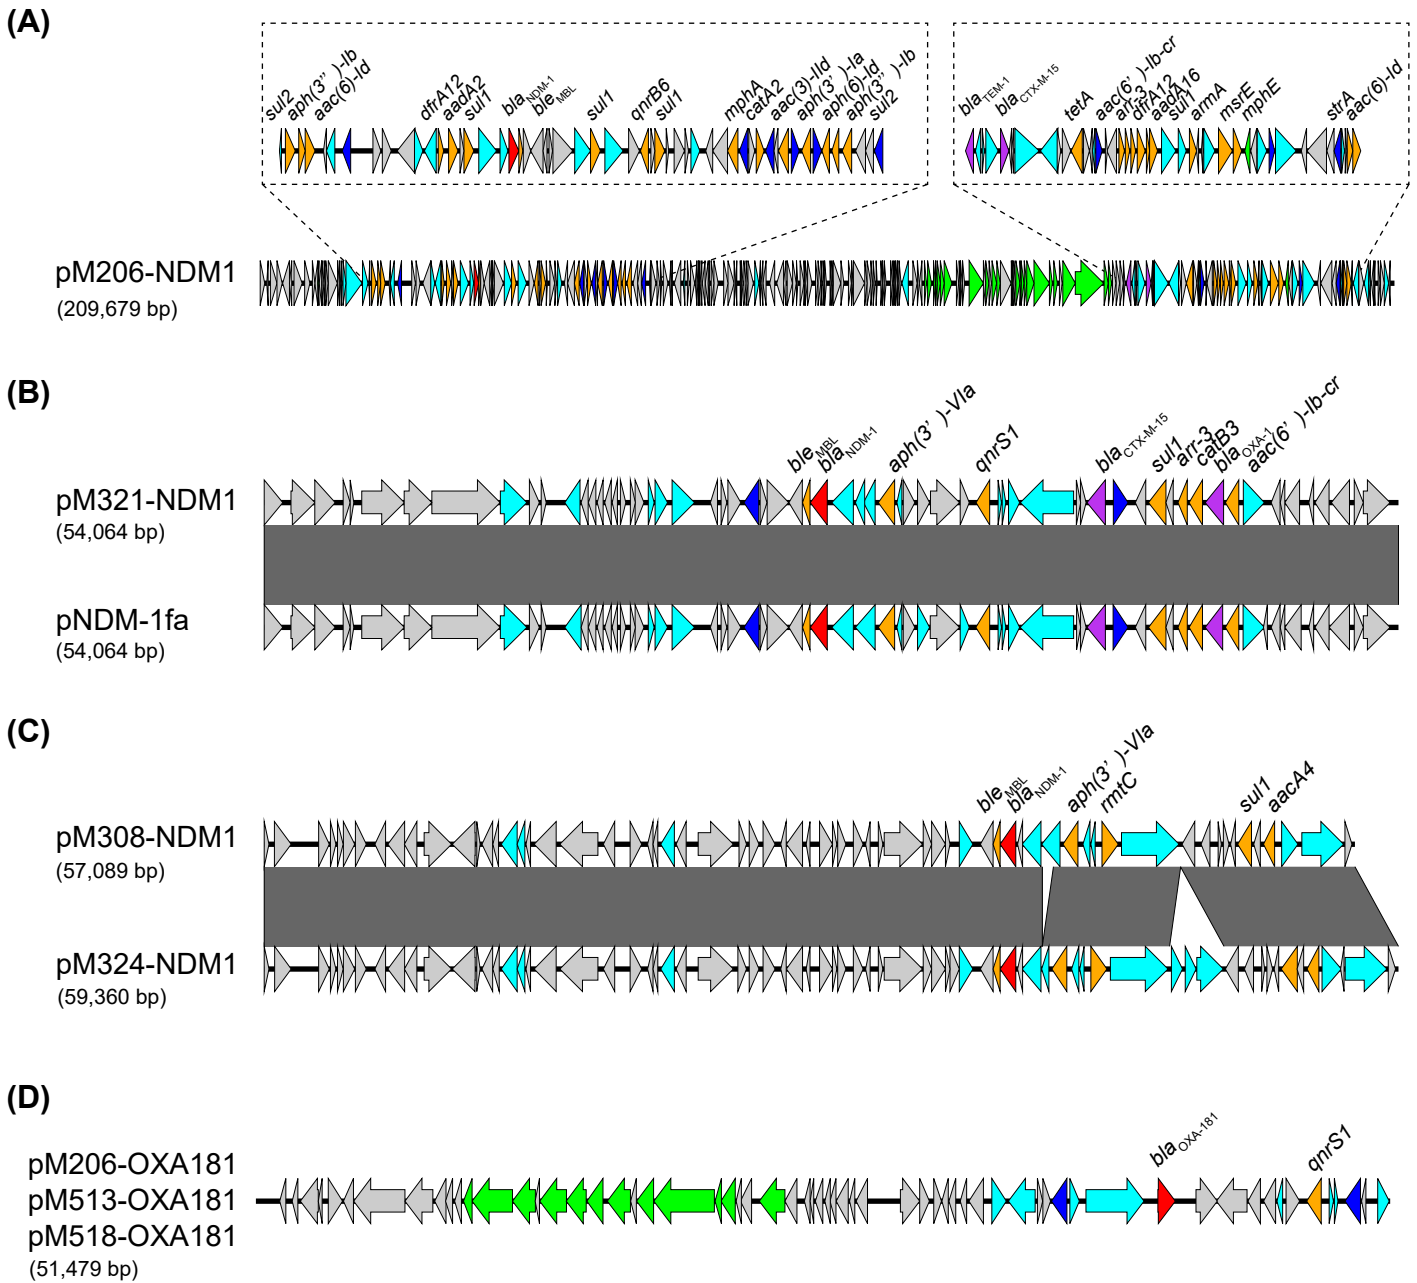

**FIG S2.** Genomic structure of the *bla*<sub>NDM</sub>- or *bla*<sub>OXA-181</sub>-harboring plasmids identified in this study. (A) Genomic structure of the *bla*<sub>NDM-1</sub>-harboring plasmids pM206-NDM1 identified in the *E. xiangfangensis* isolates M206. *bla*<sub>NDM-1</sub>, red; other  $\beta$ -lactamase genes, purple; other antimicrobial-resistance genes, orange; IS26 transposase genes, blue; other mobile genetic elements, cyan; conjugal transfer genes, green; other accessory genes, light gray. (B) Genomic structure of the *bla*<sub>NDM-1</sub>-harboring plasmid pM321-NDM1 identified in *K. pneumoniae* isolate M321. A similar plasmid pNDM-1fa (GenBank accession number CP014757.1) is included for comparison, and homologous regions are shaded in dark gray. Gene colors are the same as indicated for (A). (C) Genomic structures of the *bla*<sub>NDM-1</sub>-harboring plasmids pM308-NDM1 and pM324-NDM1 identified in *E. xiangfangensis* isolate M308 and M324, respectively. Gene colors are the same as indicated for (A). (D) Genomic structures of the *bla*<sub>OXA-181</sub>-harboring plasmids pM206-OXA181, pM513-OXA181, and pM518-OXA181 identified in *E. xiangfangensis* isolate M206, *E. coli* M513, and *E. coli* M518, respectively. Gene colors are the same as described for (A), except that red denotes the *bla*<sub>OXA-181</sub> gene.

**Table S1.** Summary of *bla*<sub>NDM</sub>-harboring plasmids in the clinical and environmental isolates analyzed in this study

| Species                                     | Clinical isolates (n = 78)                           |       |        |       | Environmental isolates (n = 14)                      |       |        |       |
|---------------------------------------------|------------------------------------------------------|-------|--------|-------|------------------------------------------------------|-------|--------|-------|
|                                             | Type of <i>bla</i> <sub>NDM</sub> -harboring plasmid |       |        | Total | Type of <i>bla</i> <sub>NDM</sub> -harboring plasmid |       |        | Total |
|                                             | IncFII                                               | IncX3 | Others |       | IncFII                                               | IncX3 | Others |       |
| <i>Escherichia coli</i> (n = 48)            | 31                                                   | 8     | 5      | 44    | 4                                                    | 1     | 0      | 5     |
| <i>Klebsiella pneumoniae</i> (n = 19)       | 7                                                    | 2     | 8      | 17    | 1                                                    | 0     | 1      | 2     |
| <i>Klebsiella quasipneumoniae</i> (n = 2)   | 0                                                    | 1     | 0      | 1     | 0                                                    | 1     | 0      | 1     |
| <i>Enterobacter xiangfangensis</i> (n = 11) | 0                                                    | 0     | 11     | 11    | 0                                                    | 0     | 0      | 0     |
| <i>Enterobacter asburiae</i> (n = 1)        | 0                                                    | 0     | 0      | 0     | 0                                                    | 1     | 0      | 1     |
| <i>Lelliottia nimipressuralis</i> (n = 1)   | 0                                                    | 1     | 0      | 1     | 0                                                    | 0     | 0      | 0     |
| <i>Citrobacter freundii</i> (n = 7)         | 0                                                    | 3     | 0      | 3     | 0                                                    | 3     | 1      | 4     |
| <i>Citrobacter amalonaticus</i> (n = 1)     | 0                                                    | 1     | 0      | 1     | 0                                                    | 0     | 0      | 0     |
| <i>Leclercia adecarbosylata</i> (n = 1)     | 0                                                    | 0     | 0      | 0     | 0                                                    | 1     | 0      | 1     |
| Total                                       | 38                                                   | 16    | 24     | 78    | 5                                                    | 7     | 2      | 14    |

**Table S3.** Antibiogram of the clinical and environmental isolates of CPE

| Antibiotic                    | % of clinical isolates<br>(n = 77) |      |       | % of environmental<br>isolates (n = 14) |      |       | <i>P</i> value <sup>†</sup> |
|-------------------------------|------------------------------------|------|-------|-----------------------------------------|------|-------|-----------------------------|
|                               | S                                  | I    | R     | S                                       | I    | R     |                             |
| Meropenem                     | 1.3                                | 0.0  | 100.0 | 0.0                                     | 0.0  | 100.0 | 0.67                        |
| Imipenem                      | 0.0                                | 3.9  | 96.1  | 0.0                                     | 0.0  | 100.0 | -                           |
| Ceftazidime                   | 0.0                                | 0.0  | 100.0 | 0.0                                     | 0.0  | 100.0 | -                           |
| Cefmetazole                   | 0.0                                | 7.8  | 92.2  | 7.1                                     | 28.6 | 64.3  | 0.02*                       |
| Ampicillin/sulbactam          | 0.0                                | 0.0  | 100.0 | 0.0                                     | 0.0  | 100.0 | -                           |
| Piperacillin/tazobactam       | 0.0                                | 0.0  | 100.0 | 0.0                                     | 0.0  | 100.0 | -                           |
| Aztreonam                     | 3.9                                | 2.6  | 93.5  | 42.9                                    | 0.0  | 57.1  | <0.001*                     |
| Gentamicin                    | 9.1                                | 0.0  | 90.9  | 42.9                                    | 0.0  | 57.1  | 0.001*                      |
| Amikacin                      | 23.4                               | 6.5  | 70.1  | 64.3                                    | 0.0  | 35.7  | 0.002*                      |
| Ciprofloxacin                 | 1.3                                | 1.3  | 97.4  | 35.7                                    | 0.0  | 64.3  | <0.001*                     |
| Levofloxacin                  | 3.9                                | 1.3  | 94.8  | 42.9                                    | 7.1  | 50.0  | <0.001*                     |
| Chloramphenicol               | 22.1                               | 20.8 | 57.1  | 64.3                                    | 0.0  | 35.7  | <0.001*                     |
| Minocyclin                    | 20.8                               | 28.6 | 50.6  | 28.6                                    | 21.4 | 50.0  | 0.52                        |
| Sulfamethoxazole/trimethoprim | 5.2                                | 0.0  | 94.8  | 0.0                                     | 0.0  | 100.0 | 0.38                        |
| Colistin                      | 97.4                               | 1.3  | 1.3   | 100.0                                   | 0.0  | 0.0   | 0.54                        |
| Fosfomycin                    | 63.6                               | 23.4 | 13.0  | 71.4                                    | 14.3 | 14.3  | 0.57                        |

S, susceptible; I, intermediate; R, resistant. <sup>†</sup>Percentages of susceptible isolates were compared by chi-square test. \**P* < 0.05.
